# Supplementary material
Source: ML conference proceedings conference paper supplement (https://proceedings.mlr.press/v129/laitonjam20a.html)
Supplement: Supplementary file 1 [file laitonjam20a-supp.pdf]

# Scalable Inference on the Soft Affiliation Graph Model for Overlapping Community Detection

**Nishma Laitonjam**

NISHMA.LAITONJAM@INSIGHT-CENTRE.ORG

**Wěipéng Huáng**

WEIPENG.HUANG@INSIGHT-CENTRE.ORG

**Neil J. Hurley**

NEIL.HURLEY@INSIGHT-CENTRE.ORG

*Insight Centre for Data Analytics, University College Dublin, Ireland*

**Editors:** Sinno Jialin Pan and Masashi Sugiyama

## 1. ELBO for S-AGM

ELBO for S-AGM is given as

$$\begin{aligned} \mathcal{L}(q) &= \mathbb{E}_q[\log p(A, W, \alpha, \pi | \eta, \beta)] - \mathbb{E}_q[\log q(W, \pi, \alpha)] \\ &= \sum_{ij:i < j} \mathbb{E}_q[\log p(a_{ij} | w_i, w_j, \pi)] \\ &+ \sum_i \sum_k \mathbb{E}_q[\log p(w_{ik} | \alpha_k)] + \sum_k \mathbb{E}_q[\log p(\pi_k | \eta_{k0}, \eta_{k1})] + \sum_k \mathbb{E}_q[\log p(\alpha_k | \beta_0, \beta_1)] \\ &- \sum_i \sum_k \mathbb{E}_q[\log q(w_{ik} | \phi_{ik0}, \phi_{ik1})] - \sum_k \mathbb{E}_q[\log q(\pi_k | \lambda_{k0}, \lambda_{k1})] - \sum_k \mathbb{E}_q[\log q(\alpha_k | \tau_{k0}, \tau_{k1})] \end{aligned}$$

Here, the term

$$\mathbb{E}_q[\log p(a_{ij} | w_i, w_j, \pi)] = a_{ij} \mathbb{E}_q[\log p_{ij}] + (1 - a_{ij}) \mathbb{E}_q[\log(1 - p_{ij})],$$

does not have an analytic form.

## 2. Computation of Gradients for SG-VI

In this section, the gradients i.e.  $\hat{g}(\bar{\phi}_{ik0})$ ,  $\hat{g}(\bar{\phi}_{ik1})$ ,  $\hat{g}(\bar{\lambda}_{k0})$ ,  $\hat{g}(\bar{\lambda}_{k1})$ ,  $\hat{g}(\tau_{k0})$  and  $\hat{g}(\tau_{k1})$  given in Algorithm 1 are computed.

### 2.1. Computation of $\hat{g}(\bar{\phi}_{ik0})$ and $\hat{g}(\bar{\phi}_{ik1})$

For  $m \in \{0, 1\}$ , we have  $\hat{g}(\bar{\phi}_{ikm})$  representing the unbiased estimate of the gradient of the ELBO wrt  $\bar{\phi}_{ikm}$ ,

$$\hat{g}(\bar{\phi}_{ikm}) = \nabla_{\bar{\phi}_{ikm}} \mathcal{L}_{\phi_{ik}}(q) = \hat{g}(\phi_{ikm}) \times \frac{1}{1 + \exp(-\bar{\phi}_{ikm})}$$

---

**Algorithm 1** VI for the S-AGM using SGD-VI at iteration  $t$ 


---

- 1: Sample a mini-batch  $\mathcal{E}^t$  of node pairs.
  - 2: **for** Each node  $i$  in  $\mathcal{E}^t$  **do**
  - 3:     Sample a mini-batch of nodes  $\mathcal{V}_i^t$ .
  - 4:     **for**  $k = 1 : K$  **do** ▷ utilizing the sampled  $\mathcal{V}_i^t$
  - 5:          $\bar{\phi}_{ik0}^{(t)} = \bar{\phi}_{ik0}^{(t-1)} + \rho_\phi^{(t)} \times \hat{g}(\bar{\phi}_{ik0})$
  - 6:          $\bar{\phi}_{ik1}^{(t)} = \bar{\phi}_{ik1}^{(t-1)} + \rho_\phi^{(t)} \times \hat{g}(\bar{\phi}_{ik1})$
  - 7:     **for**  $k = 1 : K$  **do** ▷ utilizing the sampled  $\mathcal{E}^t$
  - 8:          $\bar{\lambda}_{k0}^{(t)} = \bar{\lambda}_{k0}^{(t-1)} + \rho_\lambda^{(t)} \times \hat{g}(\bar{\lambda}_{k0})$
  - 9:          $\bar{\lambda}_{k1}^{(t)} = \bar{\lambda}_{k1}^{(t-1)} + \rho_\lambda^{(t)} \times \hat{g}(\bar{\lambda}_{k1})$
  - 10:    **for**  $k = 1 : K$  **do** ▷ utilizing the sampled  $\mathcal{E}^t$
  - 11:        $\tau_{k0}^{(t)} = \tau_{k0}^{(t-1)} + \rho_\tau^{(t)} \times \hat{g}(\tau_{k0})$
  - 12:        $\tau_{k1}^{(t)} = \tau_{k1}^{(t-1)} + \rho_\tau^{(t)} \times \hat{g}(\tau_{k1})$
- 

where  $\hat{g}(\phi_{ikm})$  is gradient of ELBO corresponding to  $\phi_{ikm}$  i.e. corresponding gradient wrt  $\phi$  with preconditioning matrix  $G(\phi) = \text{diag}(\phi)^{-1}$  where  $\phi = \{\phi_{ik0}, \phi_{ik1}\}_{i=1, \dots, N; k=1, \dots, K}$ , and  $\mathcal{L}_{\phi_{ik}}(q)$  is an expression which is proportional to  $\mathcal{L}(q)$  and dependent on  $\phi_{ik0}$  and  $\phi_{ik1}$ . We have

$$\hat{g}(\phi_{ikm}) = (G^{-1}(\phi) \nabla_\phi \mathcal{L}(q))_{ikm} = \phi_{ikm} \nabla_{\phi_{ikm}} \mathcal{L}_{\phi_{ik}}(q)$$

where,

$$\begin{aligned} \mathcal{L}_{\phi_{ik}}(q) &= \sum_{i \neq j} \mathbb{E}_q[\log p(a_{ij} | w_i, w_j, \pi)] + \mathbb{E}_q[\log p(w_{ik} | \alpha_k)] - \mathbb{E}_q[\log q(w_{ik} | \phi_{ik0}, \phi_{ik1})] \\ &= \mathbb{E}_{q(w_{ik} | \phi)} \left[ \sum_{i \neq j} \mathbb{E}_{q^{-w_{ik}}}[\log p(a_{ij} | w_i, w_j, \pi)] + \mathbb{E}_{q(\alpha_k | \tau)}[\log p(w_{ik} | \alpha_k)] \right] \\ &\quad - \mathbb{E}_q[\log q(w_{ik} | \phi_{ik0}, \phi_{ik1})] \\ &= \mathbb{E}_{q(w_{ik} | \phi)} \left[ \sum_{i \neq j} \mathbb{E}_{q^{-w_{ik}}}[\log p(a_{ij} | w_i, w_j, \pi)] + \Psi(\tau_{k0}) - \log(\tau_{k1}) + \left( \frac{\tau_{k0}}{\tau_{k1}} - 1 \right) \log w_{ik} \right] \\ &\quad - \mathbb{E}_q[\log q(w_{ik} | \phi_{ik0}, \phi_{ik1})] \end{aligned}$$

We can rewrite it as

$$\begin{aligned} \mathcal{L}_{\phi_{ik}}(q) &= \mathbb{E}_{q(w_{ik} | \phi)}[\hat{f}(w_{ik})] - \left( \log \Gamma(\phi_{ik0} + \phi_{ik1}) - \log \Gamma(\phi_{ik0}) - \log \Gamma(\phi_{ik1}) \right. \\ &\quad \left. + (\phi_{ik0} - 1)(\Psi(\phi_{ik0}) - \Psi(\phi_{ik0} + \phi_{ik1})) + (\phi_{ik1} - 1)(\Psi(\phi_{ik1}) - \Psi(\phi_{ik0} + \phi_{ik1})) \right) \end{aligned}$$

For a noisy gradient considering mini-batch of data i.e. considering only  $j \in \mathcal{V}_i$ , we have

$$\hat{f}(w_{ik}) = \frac{N}{|j \in \mathcal{V}_i^t|} \sum_{j \in \mathcal{V}_i} \mathbb{E}_{q^{-w_{ik}}}[\log p(a_{ij} | w_i, w_j, \pi)] + \Psi(\tau_{k0}) - \log(\tau_{k1}) + \left( \frac{\tau_{k0}}{\tau_{k1}} - 1 \right) \log w_{ik}$$

2.1.1. PARTIAL DERIVATIVE OF ELBO WRT  $\phi_{ikm}$ 

$$\begin{aligned} \nabla_{\phi_{ikm}} \mathcal{L}_{\phi_{ik}}(q) &= \nabla_{\phi_{ikm}} \mathbb{E}_{q(w_{ik}|\phi)}[\hat{f}(w_{ik})] \\ &\quad - (\phi_{ikm} - 1)\Psi'(\phi_{ikm}) + (\phi_{ik0} + \phi_{ik1} - 2)\Psi'(\phi_{ik0} + \phi_{ik1}) \end{aligned} \quad (1)$$

**Computation of  $\nabla_{\phi_{ikm}} \mathbb{E}_{q(w_{ik}|\phi)}[\hat{f}(w_{ik})]$ :** For a random variable  $w_{ik} \sim \text{Beta}(\phi_{ik0}, \phi_{ik1})$ , we could rewrite  $w_{ik} = \frac{w_{ik0}}{w_{ik0} + w_{ik1}}$  where  $w_{ik0} \sim \text{Gamma}(\phi_{ik0}, 1)$  and  $w_{ik1} \sim \text{Gamma}(\phi_{ik1}, 1)$ . And setting  $w_{ik0} = \exp(\epsilon_{ik0} \sqrt{\Psi'(\phi_{ik0})} + \Psi(\phi_{ik0}))$  and  $w_{ik1} = \exp(\epsilon_{ik1} \sqrt{\Psi'(\phi_{ik1})} + \Psi(\phi_{ik1}))$ , we can write

$$\nabla_{\phi_{ikm}} \mathbb{E}_{q(w_{ik}|\phi)}[\hat{f}(w_{ik})] = \nabla_{\phi_{ikm}} \mathbb{E}_{q(w_{ik0}, w_{ik1}|\phi)}[\hat{f}(w_{ik0}, w_{ik1})] = g_{\phi_{ikm}}^{rep} + g_{\phi_{ikm}}^{corr}$$

where

$$\begin{aligned} g_{\phi_{ikm}}^{rep} &= \mathbb{E}_{q(w_{ik0}, w_{ik1}|\phi)} \left[ \nabla_{w_{ikm}} \hat{f}(w_{ik0}, w_{ik1}) \times \nabla_{\phi_{ikm}} \exp(\epsilon_{ikm} \sqrt{\Psi'(\phi_{ikm})} + \Psi(\phi_{ikm})) \right] \\ &= \mathbb{E}_{q(w_{ik0}, w_{ik1}|\phi)} \left[ \nabla_{w_{ik}} \hat{f}(w_{ik}) \times (-1)^m w_{ik} (1 - w_{ik}) \left( (\log(w_{ikm}) - \Psi(\phi_{ikm})) \times \frac{\Psi''(\phi_{ikm})}{2\Psi'(\phi_{ikm})} + \Psi'(\phi_{ikm}) \right) \right] \end{aligned}$$

and

$$\begin{aligned} g_{\phi_{ikm}}^{corr} &= \mathbb{E}_{q(w_{ik0}, w_{ik1}|\phi)} \left[ \hat{f}(w_{ik0}, w_{ik1}) \left\{ \nabla_{w_{ikm}} \log q(w_{ikm}; \phi_{ikm}) \left( \nabla_{\phi_{ikm}} \exp(\epsilon_{ikm} \sqrt{\Psi'(\phi_{ikm})} + \Psi(\phi_{ikm})) \right) \right. \right. \\ &\quad \left. \left. + \nabla_{\phi_{ikm}} \log q(w_{ikm}; \phi_{ikm}) + \nabla_{\phi_{ikm}} \log J(\epsilon_{ikm}; \phi_{ikm}) \right. \right. \\ &= \mathbb{E}_{q(w_{ik0}, w_{ik1}|\phi)} \left[ \hat{f}(w_{ik0}, w_{ik1}) \left\{ (\phi_{ikm} - w_{ikm}) \left( (\log(w_{ikm}) - \Psi(\phi_{ikm})) \times \frac{\Psi''(\phi_{ikm})}{2\Psi'(\phi_{ikm})} + \Psi'(\phi_{ikm}) \right) \right. \right. \\ &\quad \left. \left. + \log(w_{ikm}) - \Psi(\phi_{ikm}) + \frac{\Psi''(\phi_{ikm})}{2\Psi'(\phi_{ikm})} \right\} \right] \end{aligned}$$

where

$$\begin{aligned} J(\epsilon_{ikm}; \phi_{ikm}) &= |\det \nabla_{\epsilon_{ikm}} \exp(\epsilon_{ikm} \sqrt{\Psi'(\phi_{ikm})} + \Psi(\phi_{ikm}))| \\ &= \exp(\epsilon_{ikm} \sqrt{\Psi'(\phi_{ikm})} + \Psi(\phi_{ikm})) \sqrt{\Psi'(\phi_{ikm})} \end{aligned}$$

To compute  $g_{\phi_{ikm}}^{rep}$ , the term  $\nabla_{w_{ik}} \hat{f}(w_{ik})$  is derived as

$$\nabla_{w_{ik}} \hat{f}(w_{ik}) = \frac{N}{|j \in \mathcal{V}_i^t|} \sum_{j \in \mathcal{V}_i^t} \mathbb{E}_{q^{-w_{ik}}} \left[ h_{ij} \frac{\pi_k w_{jk}}{1 - \pi_k w_{ik} w_{jk}} \right] + \frac{\frac{\tau_{k0}}{\tau_{k1}} - 1}{w_{ik}}$$

where

$$h_{ij} = (-1)^{1-a_{ij}} \left( p_{ij}^{-1} - 1 \right)^{a_{ij}}.$$

Putting the values of  $\nabla_{\phi_{ikm}} \mathbb{E}_{q(w_{ik}|\phi)}[\hat{f}(w_{ik})]$  in Equation (1), we get  $\nabla_{\phi_{ikm}} \mathcal{L}_{\phi_{ik}}(q)$  which is used to compute  $\hat{g}(\bar{\phi}_{ikm})$ .

Here,  $\Gamma$ ,  $\Psi$ ,  $\psi'$  and  $\Psi''$  are gamma function, digamma function, polygamma of order 1 and polygamma of order 2 respectively.

## 2.2. Computation of $\hat{g}(\bar{\lambda}_{k0})$ and $\hat{g}(\bar{\lambda}_{k1})$

For  $m \in \{0, 1\}$ , we have  $\hat{g}(\bar{\lambda}_{km})$  representing the unbiased estimate of the gradient of the ELBO wrt  $\lambda_{km}$  which is given by

$$\hat{g}(\bar{\lambda}_{km}) = \nabla_{\bar{\lambda}_{km}} \mathcal{L}_{\lambda_k}(q) = \hat{g}(\lambda_{km}) \times \frac{1}{1 + \exp(-\bar{\lambda}_{km})}$$

where  $\hat{g}(\lambda_{km})$  is gradient of ELBO corresponding to  $\lambda_{km}$  i.e. corresponding gradient wrt  $\lambda$  with preconditioning matrix  $G(\lambda) = \text{diag}(\lambda)^{-1}$  where  $\lambda = \{\lambda_{k0}, \lambda_{k1}\}_{k=1, \dots, K}$ , and  $\mathcal{L}_{\lambda_k}(q)$  is an expression which is proportional to  $\mathcal{L}(q)$  and dependent on  $\lambda_{k0}$  and  $\lambda_{k1}$ . We have

$$\hat{g}(\lambda_{km}) = (G^{-1}(\lambda) \nabla_{\lambda} \mathcal{L}(q))_{km} = \lambda_{km} \nabla_{\lambda_{km}} \mathcal{L}_{\lambda_k}(q)$$

where

$$\begin{aligned} \mathcal{L}_{\lambda_k}(q) &= \sum_{ij:i < j} \mathbb{E}_q[\log p(a_{ij}|w_i, w_j, \pi)] + \mathbb{E}_q[\log p(\pi_k|\eta_{k0}, \eta_{k1})] - \mathbb{E}_q[\log q(\pi_k|\lambda_{k0}, \lambda_{k1})] \\ &= \mathbb{E}_{q(\pi_k|\lambda_{k0}, \lambda_{k1})} \left[ \sum_{ij:i < j} \mathbb{E}_{q^{-\pi_k}}[\log p(a_{ij}|w_i, w_j, \pi)] + \log p(\pi_k|\eta_{k0}, \eta_{k1}) \right] \\ &\quad - \mathbb{E}_q[\log q(\pi_k|\lambda_{k0}, \lambda_{k1})] \\ &= \mathbb{E}_{q(\pi_k|\lambda_{k0}, \lambda_{k1})} \left[ \sum_{ij:i < j} \mathbb{E}_{q^{-\pi_k}}[\log p(a_{ij}|w_i, w_j, \pi)] \right. \\ &\quad \left. + \log \Gamma(\eta_{k0} + \eta_{k1}) - \log \Gamma(\eta_{k0}) - \log \Gamma(\eta_{k1}) + (\eta_{k0} - 1) \log \pi_k + (\eta_{k1} - 1) \log(1 - \pi_k) \right] \\ &\quad - \mathbb{E}_q[\log q(\pi_k|\lambda_{k0}, \lambda_{k1})] \end{aligned}$$

We can be rewrite it as

$$\begin{aligned} \mathcal{L}_{\lambda_k}(q) &= \mathbb{E}_{q(\pi_k|\lambda_{k0}, \lambda_{k1})}[\hat{f}(\pi_k)] - \left( \log \Gamma(\lambda_{k0} + \lambda_{k1}) - \log \Gamma(\lambda_{k0}) - \log \Gamma(\lambda_{k1}) \right. \\ &\quad \left. + (\lambda_{k0} - 1)(\Psi(\lambda_{k0}) - \Psi(\lambda_{k0} + \lambda_{k1})) + (\lambda_{k1} - 1)(\Psi(\lambda_{k1}) - \Psi(\lambda_{k0} + \lambda_{k1})) \right) \end{aligned}$$

For a noisy gradient considering mini-batch of data i.e. considering only  $(i, j) \in \mathcal{E}^t$ , we have

$$\begin{aligned} \hat{f}(\pi_k) &= s(\mathcal{E}^t) \sum_{(i,j) \in \mathcal{E}^t} \mathbb{E}_{q^{-\pi_k}}[\log p(a_{ij}|w_i, w_j, \pi)] \\ &\quad + \log \Gamma(\eta_{k0} + \eta_{k1}) - \log \Gamma(\eta_{k0}) - \log \Gamma(\eta_{k1}) + (\eta_{k0} - 1) \log \pi_k + (\eta_{k1} - 1) \log(1 - \pi_k) \end{aligned}$$

Here,  $s(\mathcal{E}^t)$  is scale value for stratified sampling.

### 2.2.1. PARTIAL DERIVATIVE OF ELBO WRT $\lambda_{km}$

$$\begin{aligned} \nabla_{\lambda_{km}} \mathcal{L}_{\lambda_k}(q) &= \nabla_{\lambda_{km}} \mathbb{E}_{q(\pi_k|\lambda)}[\hat{f}(\pi_k)] \\ &\quad - (\lambda_{km} - 1)\Psi'(\lambda_{km}) + (\lambda_{k0} + \lambda_{k1} - 2)\Psi'(\lambda_{k0} + \lambda_{k1}) \end{aligned} \quad (2)$$

**Computation of  $\nabla_{\lambda_{km}} \mathbb{E}_{q(\pi_k|\lambda_{k0}, \lambda_{k1})}[\hat{f}(\pi_k)]$  :** For a random variable  $\pi_k \sim \text{Beta}(\lambda_{k0}, \lambda_{k1})$ , we could rewrite  $\pi_k = \frac{\pi_{k0}}{\pi_{k0} + \pi_{k1}}$  where  $\pi_{k0} \sim \text{Gamma}(\lambda_{k0}, 1)$  and  $\pi_{k1} \sim \text{Gamma}(\lambda_{k1}, 1)$ . And setting  $\pi_{k0} = \exp(\epsilon_{k0} \sqrt{\Psi'(\lambda_{k0})} + \Psi(\lambda_{k0}))$  and  $\pi_{k1} = \exp(\epsilon_{k1} \sqrt{\Psi'(\lambda_{k1})} + \Psi(\lambda_{k1}))$ , we can write

$$\nabla_{\lambda_{km}} \mathbb{E}_{q(\pi_k|\lambda)}[\hat{f}(\pi_k)] = \nabla_{\lambda_{km}} \mathbb{E}_{q(\pi_{k0}, \pi_{k1}|\lambda)}[\hat{f}(\pi_{k0}, \pi_{k1})] = g_{\lambda_{km}}^{rep} + g_{\lambda_{km}}^{corr}$$

where

$$\begin{aligned} g_{\lambda_{km}}^{rep} &= \mathbb{E}_{q_{\pi_{km}}(\pi_{k0}, \pi_{k1}; \lambda)} \left[ \nabla_{\pi_{km}} \hat{f}(\pi_{k0}, \pi_{k1}) \times \nabla_{\lambda_{km}} \exp(\epsilon_{km} \sqrt{\Psi'(\lambda_{km})} + \Psi(\lambda_{km})) \right] \\ &= \mathbb{E}_{q_{\pi_{km}}(\pi_{k0}, \pi_{k1}; \lambda)} \left[ \nabla_{\pi_k} \hat{f}(\pi_k) \times (-1)^m \pi_k (1 - \pi_k) \left( (\log(\pi_{km}) - \Psi(\lambda_{km})) \times \frac{\Psi''(\lambda_{km})}{2\Psi'(\lambda_{km})} + \Psi'(\lambda_{km}) \right) \right] \end{aligned}$$

and

$$\begin{aligned} g_{\lambda_{km}}^{corr} &= \mathbb{E}_{q_{\pi_{km}}(\pi_{k0}, \pi_{k1}; \lambda)} \left[ \hat{f}(\pi_{k0}, \pi_{k1}) \left\{ \nabla_{\pi_{km}} \log q(\pi_{km}; \lambda_{km}) \left( \nabla_{\lambda_{km}} \exp(\epsilon_{km} \sqrt{\Psi'(\lambda_{km})} + \Psi(\lambda_{km})) \right) \right. \right. \\ &\quad \left. \left. + \nabla_{\lambda_{km}} \log q(\pi_{km}; \lambda_{km}) + \nabla_{\lambda_{km}} \log J(\epsilon_{km}; \lambda_{km}) \right\} \right] \\ &= \mathbb{E}_{q_{\pi_{km}}(\pi_{k0}, \pi_{k1}; \lambda)} \left[ \hat{f}(\pi_{k0}, \pi_{k1}) \left\{ (\lambda_{km} - \pi_{km}) \left( (\log(\pi_{km}) - \Psi(\lambda_{km})) \times \frac{\Psi''(\lambda_{km})}{2\Psi'(\lambda_{km})} + \Psi'(\lambda_{km}) \right) \right. \right. \\ &\quad \left. \left. + \log(\pi_{km}) - \Psi(\lambda_{km}) + \frac{\Psi''(\lambda_{km})}{2\Psi'(\lambda_{km})} \right\} \right] \end{aligned}$$

where

$$\begin{aligned} J(\epsilon_{km}; \lambda_{km}) &= |\det \nabla_{\epsilon_{km}} \exp(\epsilon_{km} \sqrt{\Psi'(\lambda_{km})} + \Psi(\lambda_{km}))| \\ &= \exp(\epsilon_{km} \sqrt{\Psi'(\lambda_{km})} + \Psi(\lambda_{km})) \sqrt{\Psi'(\lambda_{km})} \end{aligned}$$

To compute  $g_{\lambda_{km}}^{rep}$ , the term  $\nabla_{\pi_k} \hat{f}(\pi_k)$  is derived as

$$\nabla_{\pi_k} \hat{f}(\pi_k) = s(\mathcal{E}^t) \sum_{(i,j) \in \mathcal{E}^t} \mathbb{E}_{q^{-\pi_k}} \left[ h_{ij} \frac{w_{ik} w_{jk}}{1 - \pi_k w_{ik} w_{jk}} \right] + \frac{\eta_{k0} - 1}{\pi_k} - \frac{\eta_{k1} - 1}{1 - \pi_k}$$

Putting the values of  $\nabla_{\lambda_{km}} \mathbb{E}_{q(\pi_k|\lambda_{k0}, \lambda_{k1})}[\hat{f}(\pi_k)]$  in Equation (2), we get  $\nabla_{\lambda_{km}} \mathcal{L}_{\lambda_k}(q)$  which is used to compute  $\hat{g}(\bar{\lambda}_{km})$ .

### 2.3. Computation of $\hat{g}(\tau_{k0})$ and $\hat{g}(\tau_{k1})$

For  $m \in \{0, 1\}$ , we have  $\hat{g}(\tau_{km})$  representing the unbiased estimate of natural gradient of the ELBO wrt  $\tau_{km}$  which is given by

$$\hat{g}(\tau_{km}) = (G^{-1}(\tau_{k0}, \tau_{k1}) \nabla_{\tau_k} \mathcal{L}_{\tau_k}(q))_m$$

which is natural gradient corresponding to  $\tau_{km}$  i.e. corresponding gradient of the ELBO wrt  $\tau_k$  with Fisher Information matrix as preconditioning matrix  $G(\tau_{k0}, \tau_{k1})$ , and  $\mathcal{L}_{\tau_k}(q)$  is proportional to  $\mathcal{L}(q)$  and dependent on  $\tau_{k0}$  and  $\tau_{k1}$ .

$$\begin{aligned}\mathcal{L}_{\tau_k}(q) &= \sum_i \mathbb{E}_q[\log p(w_{ik}|\alpha_k)] + \mathbb{E}_q[\log p(\alpha_k|\beta_0, \beta_1)] - \mathbb{E}_q[\log q(\alpha_k|\tau_{k0}, \tau_{k1})] \\ &\propto (N + \beta_0 - \tau_{k0})(\Psi(\tau_{k0}) - \log(\tau_{k1})) \\ &\quad - (\beta_1 - \sum_i (\Psi(\phi_{ik0}) - \Psi(\phi_{ik0} + \phi_{ik1})) - \tau_{k1}) \frac{\tau_{k0}}{\tau_{k1}} + \left( \log \Gamma(\tau_{k0}) - \tau_{k0} \log(\tau_{k1}) \right)\end{aligned}$$

### 2.3.1. PARTIAL DERIVATIVE OF ELBO WRT $\tau_{k0}$ AND $\tau_{km}$

For a noisy gradient considering mini-batch of data i.e. considering only  $i \in \mathcal{E}^t$ , we have

$$\begin{aligned}\nabla_{\tau_{k0}} \mathcal{L}_{\tau_k}(q) &= \begin{bmatrix} \Psi'(\tau_{k0}) & \frac{-1}{\tau_{k1}} \end{bmatrix} \begin{bmatrix} N + \beta_0 - \tau_{k0} \\ \beta_1 - \frac{N}{|\mathcal{E}^t|} \sum_{i \in \mathcal{E}^t} (\Psi(\phi_{ik0}) - \Psi(\phi_{ik0} + \phi_{ik1})) - \tau_{k1} \end{bmatrix} \\ \nabla_{\tau_{k1}} \mathcal{L}_{\tau_k}(q) &= \begin{bmatrix} \frac{-1}{\tau_{k1}} & \frac{\tau_{k0}}{\tau_{k1}^2} \end{bmatrix} \begin{bmatrix} N + \beta_0 - \tau_{k0} \\ \beta_1 - \frac{N}{|\mathcal{E}^t|} \sum_{i \in \mathcal{E}^t} (\Psi(\phi_{ik0}) - \Psi(\phi_{ik0} + \phi_{ik1})) - \tau_{k1} \end{bmatrix}\end{aligned}$$

Now,

$$\begin{aligned}\nabla_{\tau_k} \mathcal{L}_{\tau_k}(q) &= \begin{bmatrix} \nabla_{\tau_{k0}} \mathcal{L}_{\tau_k}(q) \\ \nabla_{\tau_{k1}} \mathcal{L}_{\tau_k}(q) \end{bmatrix} \\ &= \begin{bmatrix} \Psi'(\tau_{k0}) & \frac{-1}{\tau_{k1}} \\ \frac{-1}{\tau_{k1}} & \frac{\tau_{k0}}{\tau_{k1}^2} \end{bmatrix} \begin{bmatrix} N + \beta_0 - \tau_{k0} \\ \beta_1 - \frac{N}{|\mathcal{E}^t|} \sum_{i \in \mathcal{E}^t} (\Psi(\phi_{ik0}) - \Psi(\phi_{ik0} + \phi_{ik1})) - \tau_{k1} \end{bmatrix}\end{aligned}$$

### 2.3.2. NOISY NATURAL GRADIENTS, $\hat{g}(\tau_{k0})$ AND $\hat{g}(\tau_{k1})$

Using the Fisher information matrix for Gamma( $\tau_{k0}, \tau_{k1}$ ), i.e.  $G(\tau_{k0}, \tau_{k1}) = \begin{bmatrix} \Psi'(\tau_{k0}) & \frac{-1}{\tau_{k1}} \\ \frac{-1}{\tau_{k1}} & \frac{\tau_{k0}}{\tau_{k1}^2} \end{bmatrix}$ , the natural gradients are given as

$$\begin{aligned}\begin{bmatrix} \hat{g}(\tau_{k0}) \\ \hat{g}(\tau_{k1}) \end{bmatrix} &= G^{-1}(\tau_{k0}, \tau_{k1}) \nabla_{\tau_k} \mathcal{L}_{\tau_k}(q) \\ &= \begin{bmatrix} N + \beta_0 - \tau_{k0} \\ \beta_1 - \frac{N}{|\mathcal{E}^t|} \sum_{i \in \mathcal{E}^t} (\Psi(\phi_{ik0}) - \Psi(\phi_{ik0} + \phi_{ik1})) - \tau_{k1} \end{bmatrix}\end{aligned}$$
